# Supplementary material for: The Strong Anti-Tumor Effect of Smp24 in Lung Adenocarcinoma A549 Cells Depends on Its Induction of Mitochondrial Dysfunctions and ROS Accumulation
Source: MDPI journal article supplement (doi:10.3390/toxins14090590), 2022-08-27
Supplement: s1 [file s1]

# The strong anti-tumor effect of Smp24 in lung Adenocarcinoma A549 Cells depends on its inductions of mitochondrial dysfunctions and ROS accumulation

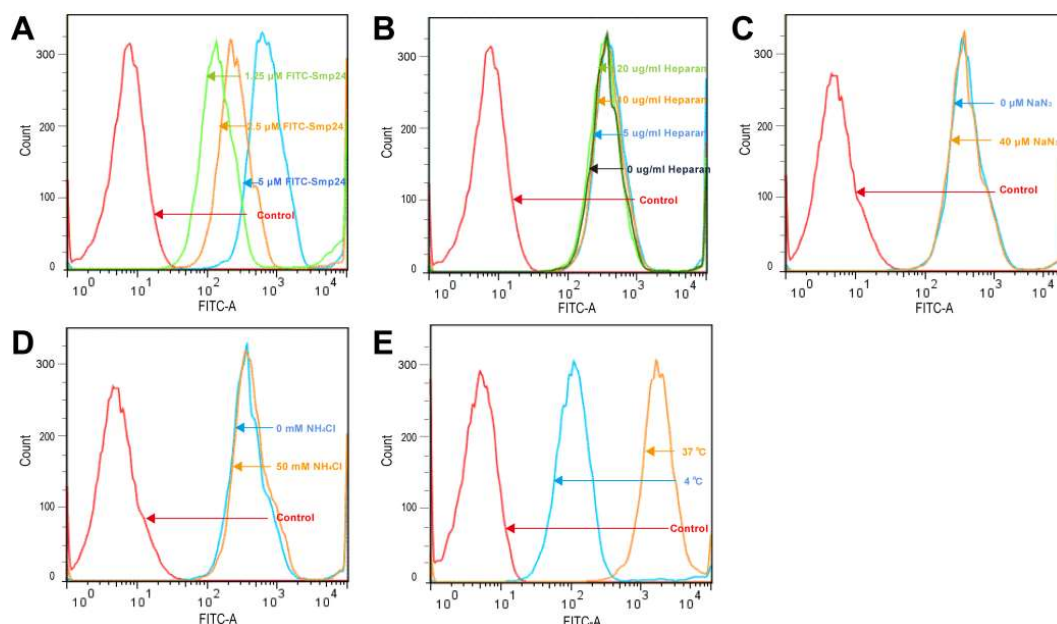

**Figure S1.** Internalization of Smp24 into A549 cells. (A) The internalization of FITC-labeled Smp24 into A549 cells after 6 h of treatment. (B–E) Effect of heparan sulfate,  $\text{NaN}_3$ ,  $\text{NH}_4\text{Cl}$  and temperature on the intracellular uptake of FITC-labeled Smp24 for 6 h, respectively. The values are presented as mean  $\pm$  SEM ( $n = 3$ ).
